1 **Extending the CWM approach to intraspecific trait variation: how to deal**  
2 **with overly optimistic standard tests?**

3

4 Running title: CWM-environment test extended for ITV

5

6 Authors: David Zelený<sup>1\*</sup>, Kenny Helsen<sup>2</sup> & Yi-Nuo Lee<sup>3</sup>

7 Institute of Ecology and Evolutionary Biology, National Taiwan University, Taiwan

8 \*Corresponding author

9

10 36 pages; 9176 words, 1 table, 5 figures, 1 appendix

11 R-code and the real world dataset is on GitHub (<https://doi.org/10.5281/zenodo.5497773>)

12 **Keywords:**

13 trait-environment relationships

14 community level traits

15 Type I error rate

16 intraspecific trait variation

17 site-specific trait values

18 permutation test

19 response traits

20 environmental filtering

21

---

<sup>1</sup> zeleny@ntu.edu.tw

<sup>2</sup> helsenkenny@gmail.com

<sup>3</sup> poiuytrewq976431@gmail.com

22 **Abstract**

23 Community weighted means (CWMs) are widely used to study the relationship between  
24 community-level functional traits and environment variation. When relationships between  
25 CWM traits and environmental variables are directly assessed using linear regression or  
26 ANOVA and tested by standard parametric tests, results are prone to inflated Type I error  
27 rates, thus producing overly optimistic results. Previous research has found that this problem  
28 can be solved by permutation tests (i.e. the max test). A recent extension of this CWM  
29 approach, that allows the inclusion of intraspecific trait variation (ITV) by partitioning  
30 information in fixed, site-specific and intraspecific CWMs, has proven popular. However,  
31 this raises the question whether the same kind of Type I error rate inflation also exists for  
32 site-specific CWM or intraspecific CWM-environment relationships. Using simulated  
33 community datasets and a real-world dataset from a subtropical montane cloud forest in  
34 Taiwan, we show that site-specific CWM-environment relationships also suffer from Type I  
35 error rate inflation, and that the severity of this inflation is negatively related to the relative  
36 ITV magnitude. In contrast, for intraspecific CWM-environment relationships, standard  
37 parametric tests have the correct Type I error rate, while being somewhat conservative, with  
38 reduced statistical power. We introduce an ITV-extended version of the max test for the ITV-  
39 extended CWM approach, which can solve the inflation problem for site-specific CWM-  
40 environment relationships, and which, without considering ITV, becomes equivalent to the  
41 “original” max test used for the CWM approach. On both simulated and real-world data, we  
42 show that this new ITV-extended max test works well across the full possible magnitude of  
43 ITV. We also provide guidelines and R codes of max test solutions for each CWM type and  
44 situation. Finally, we suggest recommendations on how to handle the results of previously  
45 published studies using the CWM approach without controlling for Type I error rate inflation.

## 46 **Introduction**

47 According to community assembly theory, which species will occur in a local community  
48 partly depends on the result of environmental filtering by the prevailing local abiotic  
49 conditions (Keddy 1992, Zobel et al. 1998). More recently, this environmental filtering is  
50 believed to act directly upon species' functional response traits (Lavorel & Garnier 2002).  
51 These traits consist of measurable properties of an individual organism that directly influence  
52 its fitness under the prevailing environmental conditions (Violle et al. 2007). The realization  
53 of this link between functional traits and the environment has opened up avenues to uncover  
54 the mechanisms behind community assembly, and to predict community responses to  
55 environmental change. This has resulted in an ever-increasing number of studies exploring  
56 functional trait-environment relationships (e.g. Miller et al. 2019).

57 At the community level, trait-environment relationships are regularly assessed  
58 through the calculation of community weighted mean trait values (CWMs) (Garnier et al.  
59 2004, Diaz et al. 2007). The resulting CWMs are then usually directly related to different  
60 environmental variables using correlation, regression, ANOVA or other general(ized) linear  
61 mixed model techniques. We call this the *CWM approach* in this study. A number of  
62 alternative methods are also available for assessing trait-environment relationships however,  
63 including the fourth corner (Legendre et al. 1997, Dray & Legendre 2008, Peres-Neto et al.  
64 2017), species' niche centroids (SNC; Peres-Neto et al. 2017, ter Braak et al. 2018) and  
65 multilevel models (Brown et al. 2014, Jamil et al. 2013, Warton et al. 2015, Miller et al.  
66 2019).

67 Traditionally, the CWM approach used fixed species-level trait values (a given  
68 species has the same trait value in all occupied sites), and thus ignored intraspecific trait  
69 variation (ITV), i.e. variation in trait values among individuals of the same species. This was  
70 justified by the assumption that, in most datasets, the amount of ITV is negligible compared

71 to the amount of interspecific trait variation, i.e. variation among species (McGill et al. 2006).  
72 However, this assumption has recently been challenged by several studies that found that  
73 both within- and among-community ITV is often substantial, at least for plants (Albert et al.  
74 2010, Messier et al. 2010, Siefert et al. 2015, Westerband et al. 2021). For other taxa, the  
75 extent of ITV remains less well understood, however (e.g. Gaudard et al. 2019 for ants, Behm  
76 and Kiers 2014 for arbuscular mycorrhizal fungi, or Dawson and Jönsson 2020 for  
77 basidiomycetes). Consequently, researchers are now actively advocating the inclusion of ITV  
78 in most community ecological trait research, including in trait-environment relationship tests  
79 (Albert et al. 2011).

80       Specifically for CWM trait-environment relationships, studies have clearly illustrated  
81 that results can be biased when using fixed species-level trait values instead of incorporating  
82 ITV (Albert et al. 2012, Borgy et al. 2017). This has resulted in an increasing number of  
83 studies where authors calculate CWMs using site- or habitat-specific trait values, measured  
84 separately for each species in each site or habitat, respectively. Lepš et al. (2011) introduced  
85 an extension of the CWM approach that allows the partitioning of the relative contribution of  
86 ITV and interspecific trait variation to community-level trait-environment relationships. This  
87 approach is based on the realization that CWMs calculated from fixed species-level trait  
88 values (“fixed” CWM, excluding ITV) can vary among communities only if their species  
89 composition differs (species turnover). On the contrary, differences in CWMs calculated  
90 from site-specific trait values (“site-specific” CWM) can be caused by both species turnover  
91 and ITV. The difference between the site-specific CWMs and fixed CWMs then only  
92 encompasses the effect of ITV (“intraspecific variability effect” CWM, or “intraspecific”  
93 CWM in short). These fixed, site-specific and intraspecific CWMs are subsequently related to  
94 environmental variables using either regression or ANOVA and their explained variation is

95 partitioned between species turnover and ITV. This method has proven popular, and to date,  
96 we have identified over 60 published case-studies using it.

97         Several studies recently found that the standard parametric tests in the CWM  
98 approach using fixed trait values are prone to Type I error inflation, resulting in the situation  
99 that even CWMs calculated from randomly generated species-level trait values often show  
100 significant correlations to environmental variables (Peres-Neto et al. 2017, ter Braak et al.  
101 2018, Zelený 2018). Peres-Neto et al. (2017) have shown that the correlation of CWMs and  
102 environmental variables is in fact numerically tightly related to the fourth corner method  
103 (introduced by Legendre et al. 1997), and that the same solution as used for controlling the  
104 Type I error rate in the fourth corner (Dray et al. 2008, ter Braak et al. 2012), can be used to  
105 control the inflated Type I error rate in the CWM approach. This solution is based on a  
106 combination of two permutation tests, one permuting the sample attribute (i.e. the  
107 environmental variable) and the other permuting the species attribute (i.e. the trait), into the  
108 “max test”, by taking the higher (more conservative) P-value of the two permutations  
109 (Cormont et al. 2011, ter Braak et al. 2012).

110         However, it is unclear if this Type I error inflation persists when introducing ITV in  
111 the CWM approach following the method of Lepš et al. (2011). Up to date, none of the  
112 papers using this method have tested, or tried to correct, for this potential Type I error  
113 inflation. Note however, that Candeias and Fraterrigo (2020) and Sandel and Low (2019)  
114 partly acknowledge, and try to address, related Type-I error inflation issues in their studies.  
115 Part of the type I error problem for fixed CWMs arises because the CWMs of different sites  
116 in a dataset are not independent, since sites usually share a least some species, and the trait  
117 values of these shared species are identical. This lack of independence between fixed CWMs  
118 reduces the effective degrees of freedom in the analysis of their relationship with  
119 environmental variables. We expect that for site-specific CWMs this problem will be relaxed,

120 because the inclusion of ITV allows species to have different trait values in different sites,  
121 thus reducing the dependence among sites. However, although ITV can be substantial, at least  
122 for plants, it is often smaller than interspecific trait variation (cf. Messier et al. 2010, Siefert  
123 et al. 2015, Westerland et al. 2021). We consequently expect that the use of site-specific trait  
124 values will not completely remove the dependency issue, but that the severity of inflation will  
125 depend on the magnitude of ITV. Moreover, the currently available max test solution cannot  
126 be applied, because the vector-based trait permutation for fixed CWMs cannot readily be  
127 extended to the site-by-species matrix for site-specific CWMs. For intraspecific CWMs, we  
128 do not have enough clues to forecast whether they are or they are not affected by inflated  
129 Type I error rate.

130 In this study, we explore 1) whether the CWM approach suffers from inflated Type I  
131 error rates when including ITV, by calculating site-specific and intraspecific CWMs, 2)  
132 whether this potential inflation depends on the magnitude of ITV, and 3) whether our newly  
133 proposed modification of the max test can overcome this potential inflation problem. To  
134 explore these questions, we quantified Type-I error rates for 1) simulated community data  
135 with varying levels of intra- and interspecific trait variation, and 2) a real-world dataset  
136 consisting of four functional leaf traits measured along a wind gradient for cloud forest  
137 vegetation in northern Taiwan.

## 138 **Methods**

### 139 *Community weighted mean approach and extension for intraspecific trait variation*

140 When individual trait-environment relationships are analysed at the community level, three  
141 objects are usually involved: a species composition matrix, an environmental variable (vector)  
142 and a species trait (vector). Species composition is represented by a  $n$ -by- $S$  matrix  $\mathbf{L} = [l_{ij}]$ ,  
143 where  $n$  is the number of sites (rows),  $S$  is the number of species (columns) and  $l_{ij}$  is the

144 contribution of species  $j$  to site  $i$  (where contribution can be expressed as abundance, biomass,  
145 cover or another quantitative measure, or as presence-absence). The environmental variable is  
146 represented by a  $n$ -elements-long vector  $\mathbf{e} = [e_i]$ , where  $e_i$  is the value of the environmental  
147 variable for site  $i$ . The trait is represented by a  $S$ -elements-long vector  $\mathbf{t} = [t_j]$ , where  $t_j$  is the  
148 trait value of species  $j$ . Naming conventions follow Peres-Neto et al. (2017), with a few  
149 exceptions (explicitly mentioned further in the text) and several extensions.

150 The CWM approach first translates the species-level vector  $\mathbf{t}$  to a site-level vector  $\mathbf{c} =$   
151  $[c_j]$ , by calculating the average trait value for a site across all present species, weighted by  
152 each species contribution, as expressed in the matrix  $\mathbf{L}$ . The community weighted mean for  
153 site  $i$  is calculated as

$$c_i = \sum_{j=1}^S p_{ij} t_j$$

154 where  $p_{ij}$  is the relative contribution of species  $j$  in site  $i$ , and  $t_j$  is fixed trait value of species  $j$   
155 (Garnier et al. 2004, Díaz et al. 2007). Relative contribution  $p_{ij}$  is calculated by dividing  $l_{ij}$  by  
156 the sum of species contributions in site  $i$  for which trait values are available, i.e. as  $p_{ij} =$   
157  $l_{ij} / \sum_{j=1}^S l_{ij}$ . Species with missing trait values should not be included in the calculation of  
158  $p_{ij}$ , so as the sum of relative species contributions in site  $i$  is always equal to one (Zelený  
159 2018). Next, vector  $\mathbf{c}$  is directly related to the environmental vector  $\mathbf{e}$  by correlation,  
160 regression, ANOVA or another method, and the significance of this relationship is often  
161 tested.

162 Extension of CWM approach to allow the inclusion of ITV is done by distinguishing  
163 site-specific and fixed trait values (Lepš et al. 2011). Site-specific trait values for species  $j$  in  
164 site  $i$  thus become a  $n$ -by- $S$  matrix  $\mathbf{T} = [t_{ij}]$ , where  $t_{ij}$  represents the mean trait value calculated  
165 from individuals of species  $j$  collected within site  $i$  (the value is missing if the species does  
166 not occur at the site or none of its individuals have been measured). The fixed trait values are

167 denoted as a  $n$ -elements-long vector  $\bar{\mathbf{t}} = [\bar{t}_j]$ , where  $\bar{t}_j$  is calculated as the mean of all site-  
 168 specific trait values ( $t_{ij}$ ) of species  $j$  across all  $n$  sites in the dataset where that species occurs.

169 Using the site-specific ( $\mathbf{T}$ ) and fixed ( $\bar{\mathbf{t}}$ ) trait values, Lepš et al. (2011) calculated site-  
 170 specific CWMs, which include ITV as

$$c_i^{SS} = \sum_{j=1}^S p_{ij} t_{ij}$$

171 resulting in a  $n$ -elements-long vector  $\mathbf{c}^{SS} = [c_i^{SS}]$ , while fixed CWMs, which do not consider  
 172 ITV, were calculated as

$$c_i^F = \sum_{j=1}^S p_{ij} \bar{t}_j$$

173 resulting in a  $n$ -elements-long vector  $\mathbf{c}^F = [c_i^F]$ , that is essentially  $c_i$  as calculated in the  
 174 absence of ITV measurements (if we assume that  $\bar{t}_j = t_j$ ). Finally, the intraspecific variability  
 175 effect (called intraspecific CWM here) is defined as the difference between the site-specific  
 176 CWM and the fixed CWM and calculated as  $c_i^{ITV} = c_i^{SS} - c_i^F$ , stored in a  $n$ -elements-long  
 177 vector  $\mathbf{c}^{ITV} = [c_i^{ITV}]$ . Using the above formulas, calculation of  $\mathbf{c}^{ITV}$  can be rewritten to

$$178 \quad c_i^{ITV} = \sum_{j=1}^S p_{ij} (t_{ij} - \bar{t}_j) = \sum_{j=1}^S p_{ij} \Delta t_{ij}$$

179 where  $\Delta t_{ij} = t_{ij} - \bar{t}_j$  are site-specific trait values centred by species, represented by a  $n$ -by- $S$   
 180 intraspecific trait matrix  $\Delta \mathbf{T} = [\Delta t_{ij}]$ . Thus, unlike  $\mathbf{c}^{SS}$ , which quantifies the absolute CWM  
 181 trait values observed at different sites,  $\mathbf{c}^{ITV}$  only quantifies the contribution of ITV to site-  
 182 specific CWMs.

183 Lepš et al. (2011) pointed out that changes in site-specific CWMs ( $\mathbf{c}^{SS}$ ) are caused  
 184 either by species composition turnover (quantified by  $\mathbf{c}^F$ ), changes in species-level trait values,  
 185 i.e. ITV (quantified by  $\mathbf{c}^{ITV}$ ), or by both. They proposed a method to partition the effect of  
 186 these two sources, in which  $\mathbf{c}^{SS}$ ,  $\mathbf{c}^F$  and  $\mathbf{c}^{ITV}$  are separately related to the vector  $\mathbf{e}$  using a



187 general linear model approach. The sum of squares (SS) are then extracted from each model,  
188 where  $SS_{\text{specific}}$  represents the total among-site trait variation explained by the environmental  
189 variable ( $\mathbf{c}^{\text{SS}} \sim \mathbf{e}$ ), while  $SS_{\text{fixed}}$  and  $SS_{\text{intra}}$  represent the contribution of species turnover ( $\mathbf{c}^{\text{F}} \sim$   
190  $\mathbf{e}$ ) and ITV ( $\mathbf{c}^{\text{ITV}} \sim \mathbf{e}$ ), respectively. If the effects of species turnover and ITV vary  
191 independently,  $SS_{\text{specific}} = SS_{\text{fixed}} + SS_{\text{intra}}$ . Usually, however, the effects of species turnover  
192 and ITV covary, either positively (i.e. when  $\mathbf{c}^{\text{F}}$  and  $\mathbf{c}^{\text{ITV}}$  both have either a positive or a  
193 negative response to the environmental variable) or negatively (i.e. when  $\mathbf{c}^{\text{F}}$  and  $\mathbf{c}^{\text{ITV}}$  respond  
194 oppositely to the environmental variable). Lepš et al. (2011) therefore suggested to add a  
195 covariation component, calculated as  $SS_{\text{cov}} = SS_{\text{specific}} - SS_{\text{fixed}} - SS_{\text{intra}}$ . This approach has  
196 been implemented in the R package *cati* (Taudiere & Violle 2015).

#### 197 *Type I error inflation for trait-environment relationships in the CWM approach*

198 Previous studies have shown that using the CWM approach without considering ITV (thus  
199 using the fixed CWM vector  $\mathbf{c}^{\text{F}}$ ) to assess the link between environment and traits often  
200 results in Type I error inflation. This is explained by the fact that a true link between traits  
201 and environment ( $\mathbf{t} \leftrightarrow \mathbf{e}$ ) can only occur if both the link between environment and species  
202 composition, and the link between traits and species composition are present ( $\mathbf{e} \leftrightarrow \mathbf{L}$  and  $\mathbf{t} \leftrightarrow \mathbf{L}$ ,  
203 respectively). Type I error inflation then occurs when the environment, but not traits, are  
204 related to the species composition (i.e.  $\mathbf{e} \leftrightarrow \mathbf{L}$  and  $\mathbf{t} \nleftrightarrow \mathbf{L}$ , Peres-Neto et al. 2017). The solution  
205 to this inflation problem was adopted for the CWM approach by Peres-Neto et al. (2017)  
206 from an analogous solution applied in the fourth-corner approach (Legendre et al. 1997; Dray  
207 & Legendre 2008). It consists of calculating two permutation tests, one permuting the rows in  
208  $\mathbf{L}$  to test the  $\mathbf{e} \leftrightarrow \mathbf{L}$  link, and one permuting the columns in  $\mathbf{L}$ , to test the  $\mathbf{t} \leftrightarrow \mathbf{L}$  link. Both tests  
209 are then combined together into the “max test” by only taking the largest P-value (least  
210 significant result) as the test of the  $\mathbf{t} \leftrightarrow \mathbf{e}$  link (Cormont et al. 2011, ter Braak et al. 2012). An

211 equivalent result is achieved by replacing the row-based permutation of the  $\mathbf{L}$  matrix by  
212 permuting vector  $\mathbf{e}$  and relating it to vector  $\mathbf{c}^F$  (calculated from not-permuted trait values  $\mathbf{t}$ ),  
213 and replacing the column-based permutation test of  $\mathbf{L}$  by permuted trait values  $\mathbf{t}$ , and relating  
214 the newly resulting vector  ${}^P\mathbf{c}^F$  (where  ${}^P$  stands for permuted) to the not-permuted vector  $\mathbf{e}$  (Fig.  
215 1; Zelený 2018). For convenience, we still refer to these permutation schemes as row- and  
216 column-based permutations, respectively.

### 217 *Simulated community data with ITV*

218 To assess whether the CWM approach extended for ITV inclusion has a correct Type I error  
219 rate, we simulated community data that included intra- and interspecific trait variation that  
220 was directly structured by a hypothetical environmental gradient. More specifically, we  
221 evaluated the potential type I error inflation for the linear regressions between vectors  $\mathbf{c}^F$ ,  $\mathbf{c}^{SS}$   
222 or  $\mathbf{c}^{ITV}$ , on the one hand and vector  $\mathbf{e}$ , on the other hand.

223 To generate simulated compositional data structured by an environmental variable ( $\mathbf{e}$ )  
224 we used the COMPAS model proposed by Minchin (1987) and extended by Fridley et al.  
225 (2007). The extended model allows the creation of a simulated community by generating  $S$   
226 unimodal species response curves along a vector  $\mathbf{e}$  of fixed length, where each species  
227 response curve (represented by a Beta function, Minchin 1987) quantifies the probability with  
228 which a random individual found at a given gradient location is assigned to that given species.  
229 The species composition of individual sites is then generated by randomly selecting  $n$   
230 locations along the environmental gradient, and assigning a predefined number of individuals  
231 to different species at each site, according to the species (response-curve-defined) occurrence  
232 probability at that site. In our simulation, we set the number of species  $S = 50$ , number of  
233 sites  $n = 25$ , and 100 individuals sampled in each site. The width of each species response  
234 curve (one of the parameters of the Beta function) is generated as a random number from a

235 uniform distribution between 0 and the total length of the environmental gradient. This length  
236 was set at 5000 units, but sites were only allowed to be sampled between 500 and 4500 units  
237 to avoid gradient edges with a lower density of species response curves. The simulation  
238 model returns two objects: a vector  $\mathbf{e}$  (positions of sites along the gradient), and a  $n$ -by- $S$   
239 composition matrix  $\mathbf{L}$  (with numbers in cells representing the counts of individuals of a given  
240 species in a given site). This simulation was performed 50 times with the same number of  
241 species and sites, resulting in 50 independent sets of  $\mathbf{e}$  and  $\mathbf{L}$ .

242 For each simulation, we generated a matrix of simulated site-specific trait values  $\mathbf{T}$ , in  
243 which both interspecific and intraspecific trait variation was completely, positively linked to  
244 vector  $\mathbf{e}$ . The  $n$ -by- $S$  matrix  $\mathbf{T}$  was generated by replacing each non-zero value of  $l_{ij}$  in a site  $i$   
245 of matrix  $\mathbf{L}$  by the value  $e_i$  (zero values of  $l_{ij}$  became missing values in  $\mathbf{T}$ ). In  $\mathbf{T} = [t_{ij}]$ ,  
246 different species occurring in the same site will have the same  $t_{ij}$  value, and the same species  
247 occurring in different sites can have different  $t_{ij}$  values. Finally, we rescaled all values in  $\mathbf{T}$   
248 into the range between 0 and 1, and added a small value (generated as a random number from  
249 a uniform distribution between -0.1 and 0.1) as a random noise to each  $t_{ij}$ .

250 We included an extra step that allowed modifying the magnitude of ITV in the  
251 simulated matrix  $\mathbf{T}$ . For this, we first calculated the vector of fixed trait values  $\bar{\mathbf{t}}$  as the means  
252 of individual columns of matrix  $\mathbf{T}$ , and calculated the matrix  $\Delta\mathbf{T} = [\Delta t_{ij}] = [t_{ij} - \bar{t}_j]$ . Then  
253 we introduced coefficient  $m$  to control the magnitude of simulated ITV in a matrix of site-  
254 specific trait values  $\mathbf{T}^m = [t_{ij}^m] = [m\Delta t_{ij} + \bar{t}_j]$ . For each simulated vector  $\mathbf{e}$  and matrix  $\mathbf{L}$  we  
255 generated a set of site-specific trait matrices  $\mathbf{T}^m$  for  $m$  ranging from 0 to 5 with 0.5 intervals.  
256 If  $m = 0$  (no ITV) all values of  $t_{ij}$  in column  $j$  are identical, and equal to  $\bar{t}_j$ ; this matrix was  
257 reduced into the vector  $\bar{\mathbf{t}}$  and used as fixed trait values. Increasing  $m$  increases the magnitude  
258 of ITV (for  $m = 1$ , the values in  $t_{ij}$  are identical to those calculated from  $\mathbf{L}$  and  $\mathbf{e}$ , as  
259 described earlier). Additionally, we also constructed a simulated  $\mathbf{T}^m$  matrix in which the trait

260 values were random values drawn from a standard normal distribution,  $N(0, 1)$ ; no random  
261 noise was added to  $t_{ij}$  value in this scenario. The latter scenario (with notation  $m = \infty$  used in  
262 the following text) represents a situation in which the site-specific trait value of a given  
263 species is a random sample from the full pool of potential trait values across all species,  
264 unconstrained by any species-specific ITV range. Thus, in total we have one vector of fixed  
265 trait values  $\bar{\mathbf{t}}$  and 11 site-specific trait matrices  $\mathbf{T}^m$  for each simulation.

### 266 *Dependence of the Type I error rate on the magnitude of ITV*

267 To assess the Type I error rates of the linear regressions of  $\mathbf{c}^F$ ,  $\mathbf{c}^{SS}$  or  $\mathbf{c}^{ITV}$  to vector  $\mathbf{e}$ , tested by  
268 parametric  $F$ -tests using our simulated community data, we first cancelled the link between  
269 the traits and the species composition by permuting the trait matrices for each separate  
270 simulation (Fig. S1). For the fixed trait values, we permuted values within vector  $\bar{\mathbf{t}}$  to get  ${}^P\bar{\mathbf{t}} =$   
271  $[{}^P\bar{t}_j]$  (Fig. S1). For the intraspecific trait values, we calculated the intraspecific trait matrix  
272  $\Delta\mathbf{T}^m$  for each  $\mathbf{T}^m$  and permuted the values within each column (species) of  $\Delta\mathbf{T}^m$  to get  ${}^P\Delta\mathbf{T}^m$   
273  $= [{}^P\Delta t_{ij}]$ . Note that these column permutations are only performed across cells where the  
274 species is present. Finally, vector  ${}^P\bar{\mathbf{t}}$  and matrix  ${}^P\Delta\mathbf{T}^m$  were combined into a matrix of  
275 permuted site-specific trait values  ${}^P\mathbf{T}^m = [{}^P t_{ij}] = {}^P\Delta t_{ij} + {}^P\bar{t}_j$ . Subsequently,  ${}^P\bar{\mathbf{t}}$ , and all  ${}^P\mathbf{T}^m$  and  
276  ${}^P\Delta\mathbf{T}^m$  matrices were combined with the  $\mathbf{L}$  matrix to calculate one  ${}^P\mathbf{c}^{SS}$ , 11  ${}^P\mathbf{c}^F$  and 11  ${}^P\mathbf{c}^{ITV}$   
277 vectors, respectively. Each of these 23 CWM vectors was then regressed against vector  $\mathbf{e}$  and  
278 significance levels assessed by parametric  $F$ -tests. We repeated all trait matrix permutations  
279 1000 times, and for each of the 23 trait- environment regressions we counted the number of  
280 significant correlations ( $p < 0.05$ ) ( $N_{\text{obs}}$ ). Since the null hypothesis that the trait is not  
281 correlated to the environmental variable is true, because we broke the link between the trait  
282 and the species composition by permuting trait values, the expected number of significant  
283 correlations (i.e. the Type I error rate) is  $\alpha(0.05) \times 1000 = 50$  ( $N_{\text{exp}}$ ). The Type I error rate

284 inflation was then quantified using the inflation index  $I(\alpha) = N_{\text{obs}}/N_{\text{exp}}$  (Lennon 2000); an  
285 index value of 1 indicates no inflation.

286 Finally, the mean  $\pm$  SD inflation index across the 50 simulations was plotted against  
287 the magnitude of ITV in the simulated data (cf. parameter  $m$ ), separately for  $P_{\text{C}}^{\text{SS}}$ , and  $P_{\text{C}}^{\text{ITV}}$ .  
288 To allow comparison with real datasets, we transformed parameter  $m$  to “relative ITV index”,  
289 calculated as the mean variance of ITV (i.e. variance of individual species’ site-specific trait  
290 values across all sites, averaged across species) divided by the variance of interspecific trait  
291 variation across all species included in the analysis (calculated from the fixed trait values).  
292 This ratio is equivalent to the  $T_{\text{PC/PR}}$  T-statistic introduced by Violle et al. (2012).

### 293 *Introducing a max solution for the ITV-extended CWM approach*

294 The previously described row- and column-based permutation tests used for controlling Type  
295 I error inflation in the CWM approach (Peres-Neto et al. 2017, ter Braak et al. 2018) cannot  
296 be directly used for the ITV-extended CWM approach (Lepš et al. 2011). While the row-  
297 based permutation test can still be performed by permuting vector  $\mathbf{e}$  (Fig. 2a), it is not clear  
298 how the column-based permutation test should permute trait values in the trait matrix  $\mathbf{T}$ ,  
299 opposed to vector  $\bar{\mathbf{t}}$  used in the absence of ITV. Both the species composition matrix ( $\mathbf{L}$ ) and  
300 the site-specific trait matrix ( $\mathbf{T}$ ) usually contain some sites  $i$  where species  $j$  is absent ( $p_{ij} = 0$ )  
301 and thus the site-specific trait value is not available ( $t_{ij} = \text{NA}$ ). Permuting columns in  $\mathbf{T}$   
302 (analogously to permuting elements in  $\mathbf{t}$ ) would mismatch values in these two matrices,  
303 causing some species with non-zero abundances in  $\mathbf{L}$  being newly paired with missing site-  
304 specific trait values in  $\mathbf{T}$  and vice versa. To avoid this problem, we propose a new max test  
305 version containing a column-based permutation test that combines separate interspecific (on  
306 vector  $\bar{\mathbf{t}}$ ) and intraspecific (on matrix  $\Delta\mathbf{T}$ ) trait permutations. For vector  $\bar{\mathbf{t}}$  the fixed trait  
307 values are directly permuted to obtain  $P\bar{\mathbf{t}}$ . The permutation of values in  $\Delta\mathbf{T}$ , however, is done

308 separately for each column (ignoring cells with missing values) to get  ${}^P\Delta\mathbf{T}$ . The permuted  
309 mean trait values in vector  ${}^P\bar{\mathbf{t}}$  and permuted site-specific trait matrix  ${}^P\Delta\mathbf{T}$  are then combined  
310 together into a new matrix of permuted site-specific trait values  ${}^P\mathbf{T}$ . This new matrix is then  
311 used to calculate  ${}^P\mathbf{c}^{SS}$ , which is then related to the non-permuted vector  $\mathbf{e}$  (Fig. 2b). The final  
312 max test then combines the row-based permutation test (using  ${}^P\mathbf{e}$ ) and the new column-based  
313 permutation test (using  ${}^P\mathbf{c}^{SS}$ ) by only taking the largest P-value (least significant result),  
314 similarly as the previously described max test for the CWM approach without extension for  
315 ITV (Cormont et al. 2011, ter Braak et al. 2012).

316 We explored whether this newly proposed max test for ITV-extended CWM approach  
317 can correctly control for Type I error rate inflation for our 50 simulations, across different  
318 magnitudes of ITV. For this, we used the same 50 simulated datasets we used to quantify  
319 inflation of Type I error rate. For fixed CWM ( $m = 0$ ), we replaced this newly modified  
320 column-based test by a test permuting only the mean trait values in  $\bar{\mathbf{t}}$  (Fig. 1b). We repeated  
321 1000 times each test for each combination of dataset and ITV magnitude, and plotted the  
322 average and standard deviation of the inflation index across the 50 simulations for each test  
323 against the ratio of intra- and interspecific trait variation, as described earlier.

#### 324 *Real world dataset: leaf traits of woody species in the cloud forest of Taiwan*

325 To illustrate the effect of ITV on community-level trait-environment relationships in a real-  
326 world dataset, we used data from the one-hectare vegetation plot in the cloud zone of  
327 northern Taiwan (24°42'25" N, 121° 26'29" E, 1758-1782 m a.s.l.), hereafter termed the  
328 Lalashan Forest Dynamics Plot. The plot is located on a wide mountain ridge, with several  
329 dry gullies and a windward slope in the eastern part of the plot. The vegetation is defined as  
330 *Chamaecyparis montane* mixed cloud forest (Li et al. 2013), with coniferous cypress  
331 *Chamaecyparis obtusa* var. *formosana* dominating the canopy, and several evergreen broad-

332 leaf tree species dominating the subcanopy (e.g., *Neolitsea accuminatissima*, *Quercus*  
333 *sessilifolia*, *Rhododendron formosanum*, *Trochodendron aralioides*). Within the 100 m × 100  
334 m Lalashan Forest Dynamics Plot, established following ForestGeo protocol (Condit 1988),  
335 we surveyed woody species in 25 systematically distributed 10 m × 10 m subplots. We  
336 recorded diameter at breast height (DBH) and species identity of all woody individuals with a  
337 DBH ≥ 1 cm, and used relative number of individuals and relative basal area (derived from  
338 DBH) to calculate the importance value index (IVI) per subplot for each species (Curtis  
339 1959). IVI values were then organized in the subplot × species **L** matrix. In total, we  
340 surveyed 1110 individuals of 49 species (including 48 broad-leaved and one coniferous  
341 species).

342 For 1–3 individuals of each broad-leaved species within each subplot, we collected  
343 three mature leaves for trait measurements. For each leaf, we measured leaf area (LA, mm<sup>2</sup>),  
344 specific leaf area (SLA, mm<sup>2</sup>/mg), leaf dry matter content (LDMC, mg/g) and leaf thickness  
345 (Lth, mm), following the protocols of Pérez-Harguindeguy et al. (2013). Leaf-level trait  
346 values were first averaged per individual and subsequently per species in each subplot, to  
347 obtain a species × site-specific trait values **T** matrix. Since the distribution of site-specific  
348 trait values of LA and SLA was strongly right-skewed, we log<sub>10</sub>-transformed them before  
349 further analysis. We measured leaf traits for 665 individuals of all 48 broad-leaf species.

350 For each subplot, we also calculated a set of topographical parameters, including  
351 mean elevation (m), convexity (m) and windwardness. Mean elevation of the subplot and  
352 convexity were calculated from the elevation of corner piles, following Valencia et al. (2004).  
353 Windwardness is a combination of aspect and slope, expressed as ‘easterness’ × slope, where  
354 ‘easterness’ is the aspect folded along the east-west axis, rescaled into +90° for the E and -  
355 90° for the W direction. Windwardness is expected to be related to the effect of the chronic  
356 north-eastern (winter) monsoon winds. We additionally calculated a hypothetical

357 ‘environmental’ factor that was directly calculated from the  $\mathbf{L}$  matrix. This variable, the  
358 subplot scores on the first ordination axis of a correspondence analysis calculated on the  $\mathbf{L}$   
359 matrix (hereafter named CA1), presents the strongest possible predictor of subplot-level  
360 species composition, since it is directly derived from it.

361 We used data from this case study for two subsequent analyses. In the first one, we  
362 evaluated the relationship between Type I error inflation and the magnitude of ITV, for the  
363 four measured leaf traits and the two environmental factors, windwardness and CA1. We  
364 calculated Type I error rates for the relationships (linear regression,  $F$ -test) between the four  
365 site-specific and intraspecific CWMs, on the one hand, and windwardness and CA1, on the  
366 other hand (we did not consider the fixed CWMs in this analysis). Species for which no trait  
367 measurements were performed were removed from  $\mathbf{L}$  matrix. The two CWM vectors,  $\mathbf{c}^{\text{SS}}$  and  
368  $\mathbf{c}^{\text{ITV}}$ , were calculated as defined earlier. To break the relationship between traits and  
369 environment in this data, we permuted site-specific and intraspecific trait data and performed  
370 10,000 independent permutations to quantify the inflation index, as described earlier. For  
371 each trait, we also calculated the relative ITV index and plotted the inflation index for each  
372 tested community-level trait–environment relationship against the relative ITV index. For  
373 site-specific CWMs, we additionally assessed if applying our newly introduced ITV-extended  
374 max test (with 999 permutations) could remove Type I error inflation.

375 In the second analysis, we used the variation partitioning method introduced by Lepš  
376 et al. (2011) and modified by Fajardo & Siefert (2018) for linear regression, to explore the  
377 specific community-level trait–environment relationships in our dataset and to quantify the  
378 effects of ITV, species turnover and their interaction on these relationships. We used all four  
379 measured leaf traits and the three measured topographical variables (but not CA1). For each  
380 trait and topographical variable combination, we calculated three linear regression models  
381 and tested them using the appropriate method: (i)  $\mathbf{c}^{\text{F}} \sim \mathbf{e}$ , tested by the “original” max test, (ii)



382  $\mathbf{c}^{SS} \sim \mathbf{e}$ , tested by the newly introduced ITV-extended max test, and (iii)  $\mathbf{c}^{ITV} \sim \mathbf{e}$ , tested by the  
383 standard parametric  $F$ -test. For (i) and (ii), we also included standard parametric  $F$ -tests to  
384 allow comparison of the results with the correct test method (max test). We decided not to  
385 correct for multiple testing issue in this analysis, as we mainly compare differences between  
386  $P$ -values calculated by standard parametric test and max permutation tests for individual trait-  
387 environment combinations. For each regression, we then calculated the sum of squares,  
388 where  $SS_{\text{fixed}}$  represents the effect of species turnover,  $SS_{\text{specific}}$  the total trait variation, and  
389  $SS_{\text{ITV}}$  the effect of ITV, respectively. We subsequently partitioned those variations by the  
390 formula  $SS_{\text{specific}} = SS_{\text{fixed}} + SS_{\text{ITV}} + \text{covariation}$ . All sum of square values were then rescaled  
391 to percentage scale, where  $SS_{\text{specific}}$  was set to 100%.

392 All calculations with the simulated and real world datasets were performed in R 4.0.4.  
393 (R Core Team 2021). The R code and the real world data set are provided at  
394 <https://doi.org/10.5281/zenodo.5497773>. The simulated datasets were generated using the  
395 *simcom* package (Zelený, version 0.1.0, <https://github.com/zdealveindy/simcom>), max  
396 permutation tests for the fixed CWM-environment relationships were performed with the  
397 *weimea* package (Zelený, version 0.1.18, <https://github.com/zdealveindy/weimea>),  
398 correspondence analysis with the *vegan* package (Oksanen et al., version 2.5-7) and the  
399 partitioning of among-plot trait variation with functions modified from the *cati* package  
400 (Taudiere & Violle, 2015, version 0.99.3).

## 401 **Results**

### 402 *Simulated community data*

403 The relationships between site-specific CWMs and environment, tested using standard  
404 parametric tests, have an inflated Type I error rate, where the inflation is negatively related to  
405 the magnitude of ITV (Fig. 3a). Type I error inflation is highest at the smallest relative ITV

406 index, approaching the inflation for fixed CWM. The inflation seems to be almost absent if  
407 the relative ITV index is higher than 3, and there is no obvious inflation ITV is unconstrained  
408 ( $m = \infty$ ). The relationship between intraspecific CWMs and environment, tested using  
409 standard parametric tests, does not have an inflated Type I error rate (Fig. 3b), and  
410 consequently shows no relationship with the relative ITV index. This test actually seems  
411 rather conservative, with all inflation index values below one.

412 Our newly introduced ITV-extended max test successfully controls for Type I error  
413 rate inflation of site-specific CWMs for all magnitudes of ITV (Fig. 3c). For fixed CWMs  
414 (ITV = 0), this test reverts to the “original” max test, which also controls for Type I error rate  
415 inflation (Fig. 3c). The relationship of intraspecific CWMs and environment was not inflated  
416 when tested by standard parametric *F*-tests, so no permutation-based correction was  
417 necessary.

#### 418 *Leaf traits of woody species in the cloud forest*

419 Regression of site-specific CWMs against the two environmental variables (the measured  
420 windwardness and generated CA1) showed an inflated Type I error rate for all four measured  
421 traits (Fig. 4a). The inflation index values were, overall, higher for regressions against CA1  
422 compared to windwardness. While the inflation index showed a somewhat decreasing trend  
423 with increasing relative ITV for CA1, no relationship was observed for windwardness. All  
424 regressions of intraspecific CWMs against CA1 and windwardness had an inflation index  
425 close to 1, with no apparent trend along the increasing relative ITV index (Fig. 4b). The  
426 newly introduced ITV-extended max test also successfully addressed the type I error inflation  
427 in this dataset (inflation index close to or lower than 1).

428 From the CWM-environment relationships in our dataset which were significant ( $P <$   
429 0.05) when tested by *F*-test, several became insignificant following max test correction (Tab.

430 1). For site-specific CWMs, Lth was positively and SLA negatively related to windwardness  
431 (Fig. 5b and c, respectively) based on both the parametric and max tests (Table 1). For fixed  
432 CWMs, LA was positively related to elevation and SLA negatively related to convexity when  
433 tested with parametric tests, but based on the max test, both relationships are only marginally  
434 significant ( $P < 0.1$ ) (Table 1). Finally, for the intraspecific CWMs (tested only by parametric  
435 test), we found a negative relationship with windwardness for both LA and SLA (Fig. 5a&c)  
436 and a positive relationship between Lth and windwardness (Fig. 5b). None of the three  
437 CWMs for LDMC were significantly related to any measured environmental variable.  
438 Variance partitioning of the trait – environment relationship into the effect of species  
439 turnover, ITV and their covariation showed that there is a considerable positive covariation  
440 fraction for the SLA and Lth relationships with windwardness (Fig. S2).

#### 441 **Discussion**

442 We illustrate with both simulated and real community data that testing community-level trait-  
443 environment relationships suffer from inflated Type I error rate when CWMs include  
444 (among-site) ITV in a similar way as when CWMs are calculated from fixed species-level  
445 trait values. We also showed that the extent of this inflation decreases with increasing  
446 amounts of ITV; for very low ITV magnitudes it approaches the inflation of trait –  
447 environment relationships using fixed CWMs, while for high ITV magnitudes it is almost  
448 non-existent (Fig. 3a). At the range of ITV magnitude observed in our real world dataset  
449 (0.35-0.60), inflation remains strong. The newly introduced max test extended for ITV  
450 proved to control Type I error rate for the full range of simulated ITV magnitude, and we  
451 suggest to use it whenever exploring site-specific CWM -environment relationships. Indeed,  
452 our simulation dataset suggests that levels of ITV need to be more than 3 times the amount of

453 interspecific trait variation before inflation becomes neglectable, so the test is likely to be  
454 needed in most real data studies.

455         Our real world dataset is rather small concerning both the number of species (48) and  
456 sites (25), and is also quite homogeneous in terms of environmental conditions (due to the  
457 small spatial extent). Consequently, we would expect the magnitude of ITV in our study (0.3-  
458 0.6, or 30-60%, respectively) to be less extensive than for more species-rich communities  
459 across strong environmental gradients at large spatial scales. Surprisingly, other studies have  
460 nonetheless found lower ITV magnitudes, both at local (15-33%, Jung et al. 2010) and global  
461 scales for plant communities (32%, Siefert et al. 2015). It therefore seems unlikely that the  
462 extent of ITV in a real datasets would be sufficiently high (>300%) to overcome type I error  
463 inflation for site-specific CWM-environment relationships, without the use of a max test  
464 correction, at least for plant communities. A detailed review of community-level studies  
465 including ITV might be useful, however, to quantify the range of ITV magnitudes for  
466 different taxa, environmental strengths and spatial scales. Also note that the comparison of  
467 ITV magnitude with other studies is slightly hampered by the use of several alternative  
468 measures for ITV magnitude (cf. Lepš et al. 2006, Albert et al. 2010, de Bello et al. 2011,  
469 Siefert et al. 2015). We nonetheless expect ITV magnitude values to differ only slightly  
470 among these different methods.

471         The use of trait values measured on the level of individual sites (“site-specific ITV”),  
472 as in this study, is just one example of how ITV can be incorporated in CWM-based trait –  
473 environment relationships. ITV covers any type of intraspecific trait variation, from variation  
474 among leaves of a single tree to variation among individuals of a species occurring on  
475 different continents. Specifically for CWM-based trait – environment relationships, the  
476 amount of included ITV can gradually range from the inclusion of only ‘habitat- specific’ or  
477 ‘region-specific’ ITV, where sites of one habitat or region are characterized by fixed species-

478 level trait values (e.g. Lepš et al. 2011, Helsen et al. 2018), to the inclusion of fine-scale  
479 intra-site ITV (trait variation among individuals in a site) (e.g. Carlucci et al. 2015). The  
480 severity of type I error inflation is expected to decrease along this gradient, since the more  
481 detailed ITV information is included, the more likely ITV magnitude will be considerable.  
482 Our study nonetheless suggests that Type I error corrections will remain necessary for any  
483 study where the magnitude of ITV is lower than 3.

484         The actual level of Type I error inflation in real world datasets is also influenced by  
485 several other parameters, next to the amount of ITV. As shown using a similar simulation  
486 model as used in our study, inflation increases with decreasing beta diversity of the species  
487 compositional data, increasing number of community samples used in the analysis and  
488 increasing strength of the link between the environmental variable and the species  
489 composition data (Zelený 2018). The strength of the **e-L** link in particular likely explains  
490 why the inflation is high for site-specific CWM related to CA1 (which is intrinsically  
491 strongly linked to the **L** matrix) and low when related to the real measured environmental  
492 variable, windwardness (with has a much weaker link to matrix **L**). The newly introduced  
493 ITV-extended max test nonetheless solved the inflated Type I error rate problem in both the  
494 simulated and real data.

495         Surprisingly, the relationships between the intraspecific CWMs and environment  
496 showed no Type I error inflation when tested with standard parametric tests. Even more, this  
497 test appears to be conservative, with inflation rates being consistently lower than 1, in both  
498 simulated data and real world data. We hypothesise that the lack of power is caused by the  
499 way intraspecific CWMs are calculated: the matrix of site-specific trait values is converted  
500 into the matrix of intraspecific trait values by centering the species' traits, resulting in  
501 intraspecific trait values and CWM's which tend to have values close to zero, and thus very  
502 low variance. In the case of our less noisy simulated dataset, this behaviour is quite

503 pronounced, resulting in low inflation index values ( $<0.4$ ), while for the noisier real world  
504 data this behaviour is less pronounced, with inflation index values only slightly below 1.  
505 Detailed analyses should be performed in the future to uncover whether this is the real reason  
506 for the apparent conservatism of the test.

507 Our study demonstrates the problem of Type I error inflation for site-specific  
508 CWMs – environment relationships assessed specifically using linear regression. We assume,  
509 however, that the same problem applies to other methods that can be used to assess trait-  
510 environment relationships with the CWM approach, including correlation (parametric or non-  
511 parametric), weighted regression (ter Braak et al. 2017) or ANOVA. Although not  
512 specifically assessed in this study, we assume that our new ITV-extended max test can solve  
513 this inflation in all of these methods, since they belong (or are closely related) to the same  
514 statistical family of general linear models. As shown by ter Braak et al. (2017) for fixed  
515 CWMs, the “original” max test is also applicable to this whole range of methods. It  
516 nonetheless remains useful to formally evaluate the sensitivity of these different methods to  
517 the Type I error rate inflation and their respective power.

518 In our analysis of trait-environment relationship on real cloud forest data, we  
519 deliberately ignored the Type I error inflation problem associated with multiple testing,  
520 which arises when conclusions are based on results of several (non-independent) tests carried  
521 out on the same dataset. Note that this issue is independent of the Type I error rate inflation  
522 explored in this study. When the CWM approach is used to identify multiple trait-  
523 environment relationships, an additional correction of significance levels for this multiple  
524 testing issue is necessary to avoid inflated family-wise Type I error rates (see Wright 1992).  
525 We suggest to base this correction on the number of trait-environment pairs, not on the  
526 overall number of tests performed; i.e. no matter whether the study focuses on only a single  
527 CWM type (e.g. the site-specific one) or all three CWMs, each P-value should be adjusted by

528 the value calculated as the number of traits  $\times$  the number of environmental variables. The  
529 correction for multiple testing will also require a higher number of permutations for each  
530 individual test, as to allow the adjusted  $P$ -values to reach values lower than the selected  
531 significance threshold (e.g.  $\alpha = 0.05$ ).

### 532 **Practical considerations**

533 For researchers using the CWM approach extended for ITV, we suggest the following  
534 workflow. From the three CWMs calculated within this extension, namely fixed, site-specific  
535 and intraspecific CWM, only the first two are prone to Type I error inflation. For fixed  
536 CWMs, we suggest using the original max (permutation) test, as introduced by Peres-Neto et  
537 al. (2017), which is currently available in the *weimea* R package (Zelený, unpublished;  
538 <https://github.com/zdealveindy/weimea>). For site-specific CWMs, the max test extended for  
539 ITV as introduced in this study can be used, by applying the custom-made functions provided  
540 in the R code accompanying this manuscript ([https://github.com/zdealveindy/ITV\\_CWM](https://github.com/zdealveindy/ITV_CWM)).  
541 For intraspecific CWMs, standard parametric tests do not suffer from Type I error rate  
542 inflation and no correction is needed.

543 When using the results of previously published studies that applied the CWM  
544 approach extended for ITV without controlling for Type I error inflation, be aware that some  
545 of them may be overly optimistic. As previously shown for the CWM approach without  
546 extension for ITV, Type I error inflation in fixed CWM-environment relationships correlate  
547 positively with dataset size and strength of the link between species composition and  
548 environment, and negatively with the overall species beta diversity (Zelený 2018). We show  
549 that for assessing site-specific CWM-environment relationships using the CWM approach  
550 extended for ITV, inflation is additionally negatively dependent on the magnitude of ITV.

551 **Acknowledgements**

552 Our thanks goes out to all members of the Vegetation Ecology Lab at the National Taiwan  
553 University and several volunteers, who participated in the vegetation data collection  
554 campaign of the Lalashan Forest Dynamics Plot, especially Ting Chen and Kun-Sung Wu.  
555 This study was supported by a grant from the Taiwanese Ministry of Science and Technology  
556 (MOST 109-2621-B-002-002-MY3).

557 **Supporting Information**

558 Appendix S1 with Figure S1 and S2

559 **Literature Cited**

560 Albert, C. H., W. Thuiller, N. G. Yoccoz, A. Soudant, F. Boucher, P. Saccone, and S. Lavorel.  
561 2010. Intraspecific functional variability: extent, structure and source of variation.  
562 *Journal of Ecology* 98:604–613.

563 Albert, C. H., F. de Bello, I. Boulangeat, G. Pellet, S. Lavorel, and W. Thuiller. 2012. On the  
564 importance of intraspecific variability for the quantification of functional diversity.  
565 *Oikos* 121:116–126.

566 Albert, C. H., F. Grassein, F. M. Schurr, G. Vieilledent, and C. Violle. 2011. When and how  
567 should intraspecific variability be considered in trait-based plant ecology?  
568 *Perspectives in Plant Ecology, Evolution and Systematics* 13:217–225.

569 Albert, C. H., W. Thuiller, N. G. Yoccoz, R. Douzet, S. Aubert, and S. Lavorel. 2010. A  
570 multi-trait approach reveals the structure and the relative importance of intra- vs.  
571 interspecific variability in plant traits. *Functional Ecology* 24:1192–1201.



- 572 Behm, J. E., and E. T. Kiers. 2014. A phenotypic plasticity framework for assessing  
573 intraspecific variation in arbuscular mycorrhizal fungal traits. *Journal of Ecology*  
574 102:315–327.
- 575 Borgy, B., et al. 2017. Sensitivity of community-level trait–environment relationships to data  
576 representativeness: A test for functional biogeography. *Global Ecology and*  
577 *Biogeography* 26:729–739.
- 578 Brown, A. M., D. I. Warton, N. R. Andrew, M. Binns, G. Cassis, and H. Gibb. 2014. The  
579 fourth-corner solution –using predictive models to understand how species traits  
580 interact with the environment. *Methods in Ecology and Evolution* 5:344–352.
- 581 Candeias, M., and J. Fraterrigo. 2020. Trait coordination and environmental filters shape  
582 functional trait distributions of forest understory herbs. *Ecology and Evolution*  
583 10:14098–14112.
- 584 Carlucci, M. B., V. J. Debastiani, V. D. Pillar, and L. D. S. Duarte. 2015. Between- and  
585 within-species trait variability and the assembly of sapling communities in forest  
586 patches. *Journal of Vegetation Science* 26:21–31.
- 587 Condit, R. 1998. *Tropical forest census plots: methods and results from Barro Colorado*  
588 *Island, Panama and a comparison with other plots*. Springer, Berlin, Germany.
- 589 Cormont, A., C. C. Vos, C. A. M. van Turnhout, R. P. B. Foppen, and C. J. F. ter Braak. 2011.  
590 Using life-history traits to explain bird population responses to changing weather  
591 variability. *Climate Research* 49:59–71.
- 592 Curtis, J. T. 1959. *The vegetation of Wisconsin: an ordination of plant communities*.  
593 University of Wisconsin Press, Madison, WI, US.
- 594 Dawson, S. K., and M. Jönsson. 2020. Just how big is intraspecific trait variation in  
595 basidiomycete wood fungal fruit bodies? *Fungal Ecology* 46: 100865.

- 596 Díaz, S., S. Lavorel, F. de Bello, F. Quétier, K. Grigulis, and T. M. Robson. 2007.  
597 Incorporating plant functional diversity effects in ecosystem service assessments.  
598 Proceedings of the National Academy of Sciences of the United States of America  
599 104:20684–20689.
- 600 Dray, S., and P. Legendre. 2008. Testing the species traits-environment relationships: The  
601 fourth-corner problem revisited. *Ecology* 89:3400–3412.
- 602 Fajardo, A., and A. Siefert. 2018. Intraspecific trait variation and the leaf economics  
603 spectrum across resource gradients and levels of organization. *Ecology* 99:1024–1030.
- 604 Fridley, J. D., D. B. Vandermast, D. M. Kuppinger, M. Manthey, and R. K. Peet. 2007. Co-  
605 occurrence based assessment of habitat generalists and specialists: A new approach  
606 for the measurement of niche width. *Journal of Ecology* 95:707–722.
- 607 Garnier, E., et al. 2004. Plant functional markers capture ecosystem properties during  
608 secondary succession. *Ecology* 85:2630–2637.
- 609 Gaudard, C. A., M. P. Robertson, and T. R. Bishop. 2019. Low levels of intraspecific trait  
610 variation in a keystone invertebrate group. *Oecologia* 190:725–735.
- 611 Helsen, K., et al. 2018. Impact of an invasive alien plant on litter decomposition along a  
612 latitudinal gradient. *Ecosphere* 9:e02097.
- 613 Jamil, T., W. A. Ozinga, M. Kleyer, and C. J. F. ter Braak. 2013. Selecting traits that explain  
614 species-environment relationships: A generalized linear mixed model approach.  
615 *Journal of Vegetation Science* 24:988–1000.
- 616 Jung, V., C. H. Albert, C. Violle, G. Kunstler, G. Loucougaray, and T. Spiegelberger. 2010.  
617 Intraspecific trait variability mediates the response of subalpine grassland  
618 communities to extreme drought events. *Journal of Ecology* 102:45–53.
- 619 Keddy, P. A. 1992. Assembly and response rules: two goals for predictive community  
620 ecology. *Journal of Vegetation Science* 3:157–164.

- 621 Lavorel, S., and E. Garnier. 2002. Predicting changes in community composition and  
622 ecosystem functioning from plant traits: Revisiting the Holy Grail. *Functional*  
623 *Ecology* 16:545–556.
- 624 Legendre, P., R. Galzin, and M. L. Harmelin-Vivien. 1997. Relating behavior to habitat:  
625 Solutions to the fourth-corner problem. *Ecology* 78:547–562.
- 626 Lennon, J. J. 2000. Red-shifts and red herrings in geographical ecology. *Ecography* 23:101–  
627 113.
- 628 Lepš, J., F. de Bello, P. Šmilauer, and J. Doležal. 2011. Community trait response to  
629 environment: Disentangling species turnover vs intraspecific trait variability effects.  
630 *Ecography* 34:856–863.
- 631 Li, C.-F., et al. 2013. Classification of Taiwan forest vegetation. *Applied Vegetation Science*  
632 16:698–719.
- 633 McGill, B. J., B. J. Enquist, E. Weiher, and M. Westoby. 2006. Rebuilding community  
634 ecology from functional traits. *Trends in Ecology and Evolution* 21:178–185.
- 635 Messier, J., B. J. McGill, and M. J. Lechowicz. 2010. How do traits vary across ecological  
636 scales? A case for trait-based ecology. *Ecology Letters* 13:838–848.
- 637 Miller, J. E. D., E. I. Damschen, and A. R. Ives. 2019. Functional traits and community  
638 composition: A comparison among community-weighted means, weighted  
639 correlations, and multilevel models. *Methods in Ecology and Evolution* 10:415–425.
- 640 Minchin, P. 1987. Simulation of multidimensional community patterns: towards a  
641 comprehensive model. *Vegetatio* 71:145–156.
- 642 Peres-Neto, P. R., S. Dray, and C. J. F. ter Braak. 2017. Linking trait variation to the  
643 environment: Critical issues with community-weighted mean correlation resolved by  
644 the fourth-corner approach. *Ecography* 40:806–816.

- 645 Pérez-Harguindeguy, et al. 2013. New handbook for standardised measurement of plant  
646 functional traits worldwide. *Australian Journal of Botany* 61:167–234.
- 647 R Core Team. 2021. R: A language and environment for statistical computing. R Foundation  
648 for Statistical Computing, Vienna, Austria. URL <https://www.R-project.org/>.
- 649 Sandel, B., and R. Low. 2019. Intraspecific trait variation, functional turnover and trait  
650 differences among native and exotic grasses along a precipitation gradient. *Journal of*  
651 *Vegetation Science* 30:633–643.
- 652 Siefert, A., et al. 2015. A global meta-analysis of the relative extent of intraspecific trait  
653 variation in plant communities. *Ecology Letters* 18:1406–1419.
- 654 Taudiere, A., and C. Violle. 2015. cati: an R package using functional traits to detect and  
655 quantify multi-level community assembly processes. *Ecography* 39:699–708.
- 656 ter Braak, C. J. F., A. Cormont, and S. Dray. 2012. Improved testing of species traits-  
657 environment relationships in the fourth-corner problem. *Ecology* 93:1525–1526.
- 658 ter Braak, C. J. F., P. Peres-Neto, and S. Dray. 2018. Simple parametric tests for trait-  
659 environment association. *Journal of Vegetation Science* 29:801–811.
- 660 Valencia, R., et al. 2004. Tree species distributions and local habitat variation in the Amazon:  
661 large forest plot in eastern Ecuador. *Journal of Ecology* 92:214–229.
- 662 Violle, C., B. J. Enquist, B. J. McGill, L. Jiang, C. H. Albert, C. Hulshof, V. Jung, and J.  
663 Messier. 2012. The return of the variance: intraspecific variability in community  
664 ecology. *Trends in Ecology and Evolution* 27:244–252.
- 665 Violle, C., M. M.-L. Navas, D. Vile, E. Kazakou, C. Fortunel, I. Hummel, and E. Garnier.  
666 2007. Let the concept of trait be functional! *Oikos* 116:882–893.
- 667 Warton, D. I., B. Shipley, and T. Hastie. 2015. CATS regression -a model-based approach to  
668 studying trait-based community assembly. *Methods in Ecology and Evolution* 6:389–  
669 398.

- 670 Westerband, A. C., J. L. Funk, and K. E. Barton. 2021. Intraspecific trait variation in plants: a  
671 renewed focus on its role in ecological processes. *Annals of Botany* 127:397–410.
- 672 Wright, S. P. 1992. Adjusted *P*-values for simultaneous inference. *Biometrics* 48:1005–1013.
- 673 Zelený, D. 2018. Which results of the standard test for community weighted mean approach  
674 are too optimistic? *Journal of Vegetation Science* 29: 953–966.
- 675 Zobel, M., E. van der Maarel, and C. Dupré. 1998. Species pool: the concept, its  
676 determination and significance for community restoration. *Applied Vegetation*  
677 *Science* 1:55–66.
- 678
- 679

680 **Tables**

681 Table 1. Leaf traits of woody species in the cloud forest: regression of site-specific (SS), fixed (F) and intraspecific (ITV) CWM on  
 682 environmental variables, tested by parametric  $F$ -test ( $P_{\text{par}}$ ) and max permutation test ( $P_{\text{max}}$ ; ITV-extended max test was used for site-specific  
 683 CWM, and “original” max test for fixed CWM). Significant results ( $P < 0.05$ ) are in bold.

684

| Environmental variable | CWM type | LA    |      |                  |                  | Lth   |       |                  |                  | SLA   |       |                  |                  | LDMC  |      |                  |                  |
|------------------------|----------|-------|------|------------------|------------------|-------|-------|------------------|------------------|-------|-------|------------------|------------------|-------|------|------------------|------------------|
|                        |          | $r^2$ | $F$  | $P_{\text{par}}$ | $P_{\text{max}}$ | $r^2$ | $F$   | $P_{\text{par}}$ | $P_{\text{max}}$ | $r^2$ | $F$   | $P_{\text{par}}$ | $P_{\text{max}}$ | $r^2$ | $F$  | $P_{\text{par}}$ | $P_{\text{max}}$ |
| elevation              | SS       | 0.101 | 2.58 | 0.122            | 0.179            | 0.025 | 0.60  | 0.448            | 0.518            | 0.001 | 0.01  | 0.911            | 0.923            | 0.018 | 0.42 | 0.523            | 0.628            |
|                        | F        | 0.166 | 4.58 | <b>0.043</b>     | 0.095            | 0.035 | 0.85  | 0.367            | 0.497            | 0.002 | 0.05  | 0.822            | 0.881            | 0.003 | 0.07 | 0.799            | 0.860            |
|                        | ITV      | 0.006 | 0.15 | 0.704            |                  | 0.011 | 0.25  | 0.624            |                  | 0.000 | 0.01  | 0.940            |                  | 0.061 | 1.48 | 0.236            |                  |
| convexity              | SS       | 0.031 | 0.73 | 0.403            | 0.442            | 0.073 | 1.82  | 0.190            | 0.218            | 0.066 | 1.63  | 0.215            | 0.252            | 0.008 | 0.18 | 0.678            | 0.691            |
|                        | SS       | 0.030 | 0.70 | 0.411            | 0.486            | 0.024 | 0.56  | 0.461            | 0.549            | 0.164 | 4.50  | <b>0.045</b>     | 0.091            | 0.120 | 3.14 | 0.089            | 0.154            |
|                        | ITV      | 0.004 | 0.08 | 0.778            |                  | 0.089 | 2.25  | 0.147            |                  | 0.003 | 0.06  | 0.810            |                  | 0.033 | 0.79 | 0.384            |                  |
| windwardness           | SS       | 0.120 | 3.13 | 0.090            | 0.104            | 0.285 | 9.18  | <b>0.006</b>     | <b>0.007</b>     | 0.370 | 13.50 | <b>0.001</b>     | <b>0.003</b>     | 0.001 | 0.02 | 0.890            | 0.909            |
|                        | F        | 0.035 | 0.84 | 0.369            | 0.488            | 0.054 | 1.31  | 0.265            | 0.364            | 0.065 | 1.60  | 0.219            | 0.311            | 0.018 | 0.43 | 0.520            | 0.609            |
|                        | ITV      | 0.172 | 4.79 | <b>0.039</b>     |                  | 0.412 | 16.13 | <b>0.001</b>     |                  | 0.431 | 17.41 | <b>0.000</b>     |                  | 0.006 | 0.14 | 0.710            |                  |

685

686

687 **Figures**

688 **Figure 1.** The schema of (a) the row-based and (b) the column-based permutation test for  
689 fixed trait values CWM. Resulting *P*-values from both tests are combined into the max test.  
690 Grey cells represent values of non-zero species abundances (in species composition matrix **L**  
691 and **P**) or values of traits and environmental variables that are not missing.

692

693 **Figure 2.** The schema of ITV-extended max test. (a) The row-based permutation test for site-  
694 specific trait values. (b) Combined column-based permutation test, with separate permutation  
695 of fixed trait values and intraspecific trait values. Max test combines *P*-values from both tests  
696 by selecting the higher one. Grey cells represent values of non-zero species abundances (in  
697 species composition matrix **L** and **P**) or values of traits and environmental variables which  
698 are not missing.

699

700 **Figure 3.** The effect of the magnitude of intraspecific trait variation (relative ITV index) on  
701 inflation index (mean + standard deviation) of the linear regression between (a, c) site-  
702 specific CWM or (b) intraspecific CWM and the ‘environmental variable’ of the simulated  
703 data, tested by (a, b) standard parametric test and (c) “max” permutation test. Black square =  
704 fixed CWM (cf. site-specific CWM with no ITV). Relative ITV index equal to infinity ( $\infty$ )  
705 represents situation when site-specific trait matrix with trait values randomly sampled from  
706 normal distribution was used. No inflation occurs if the inflation index is equal or lower to 1  
707 (indicated by dashed horizontal line).

708

709 **Figure 4.** The effect of the magnitude of intraspecific trait variation (relative ITV index) on  
710 inflation index (mean + standard deviation) of the linear regression between (a, c) site-

711 specific CWM or (b) intraspecific CWM and windwardness (gray italics) and CA1 (black) of  
712 the cloud forest data, tested by (a,b) standard parametric test and (c) “max” permutation test.  
713 No inflation occurs if the inflation index is equal or lower to 1 (indicated by dashed  
714 horizontal line). LA = leaf area, SLA = specific leaf area, LDMC = leaf dry matter content,  
715 Lth = leaf thickness.

716

717 **Figure 5.** Regression between windwardness and the site-specific, fixed and intraspecific  
718 CWM of (a) leaf area, (b) leaf thickness, and (c) specific leaf area. All CWMs were z-  
719 transformed. Regressions significant at  $P < 0.05$  (max test in the case of site-specific and  
720 fixed CWM, parametric test in the case of intraspecific CWM) were visualized by a solid  
721 regression line, non- significant regressions by a dashed line.

722



723 Figure 1

724

(a) Row-based permutation test

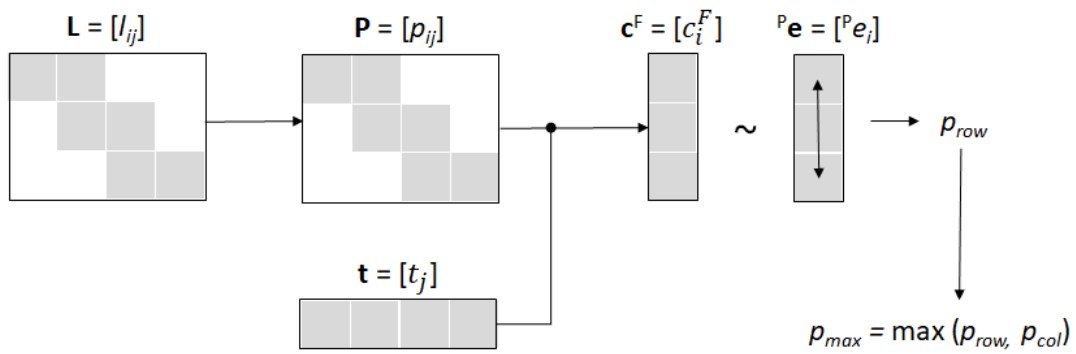

(b) Column-based permutation test

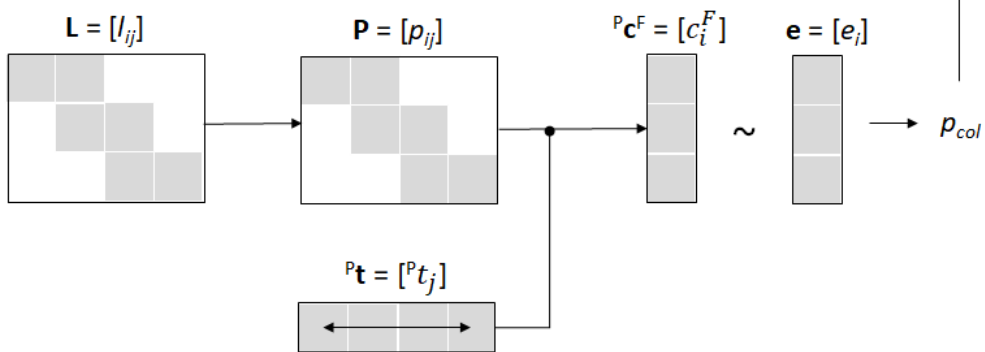

725

726

727 Figure 2

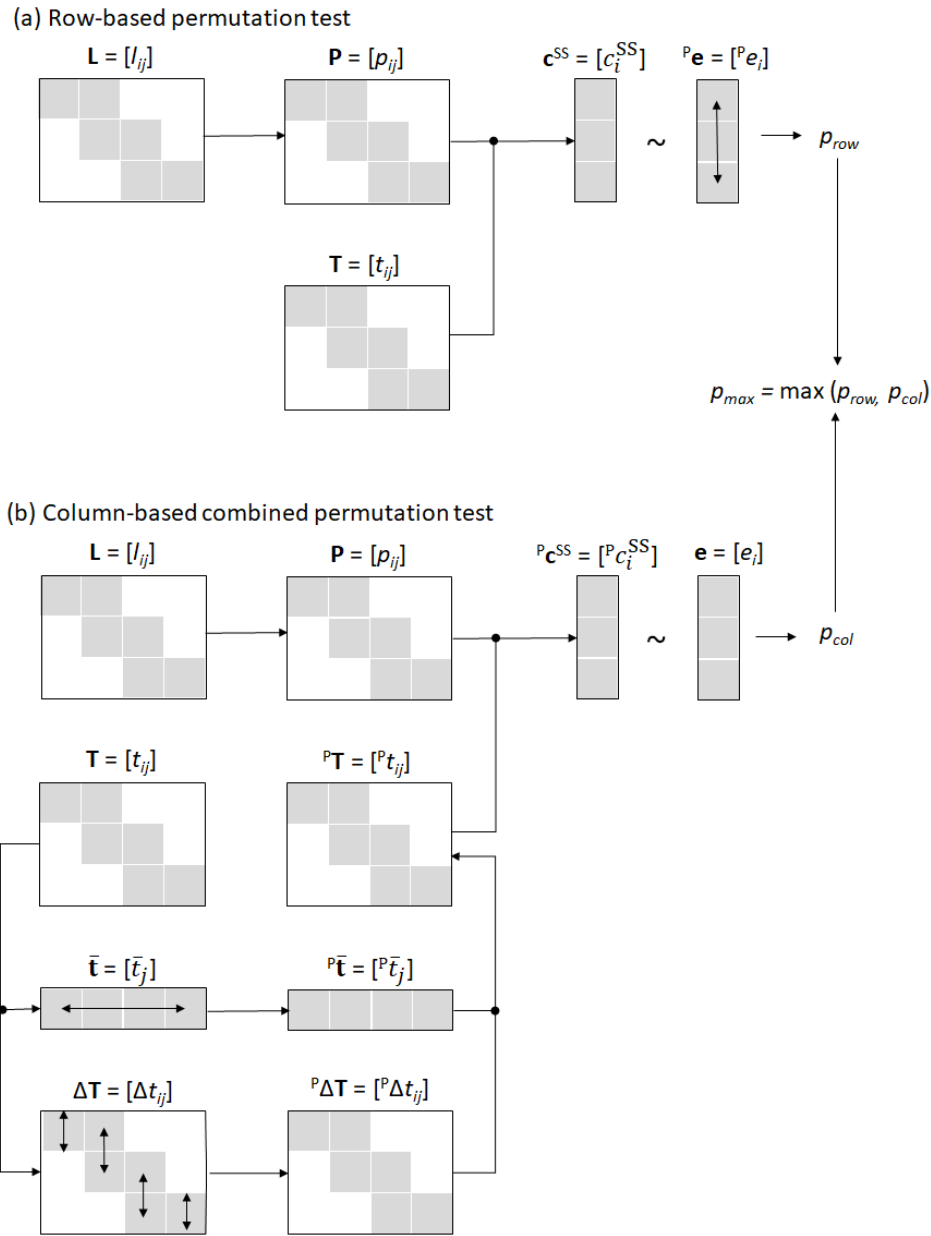

728

729

730 Figure 3

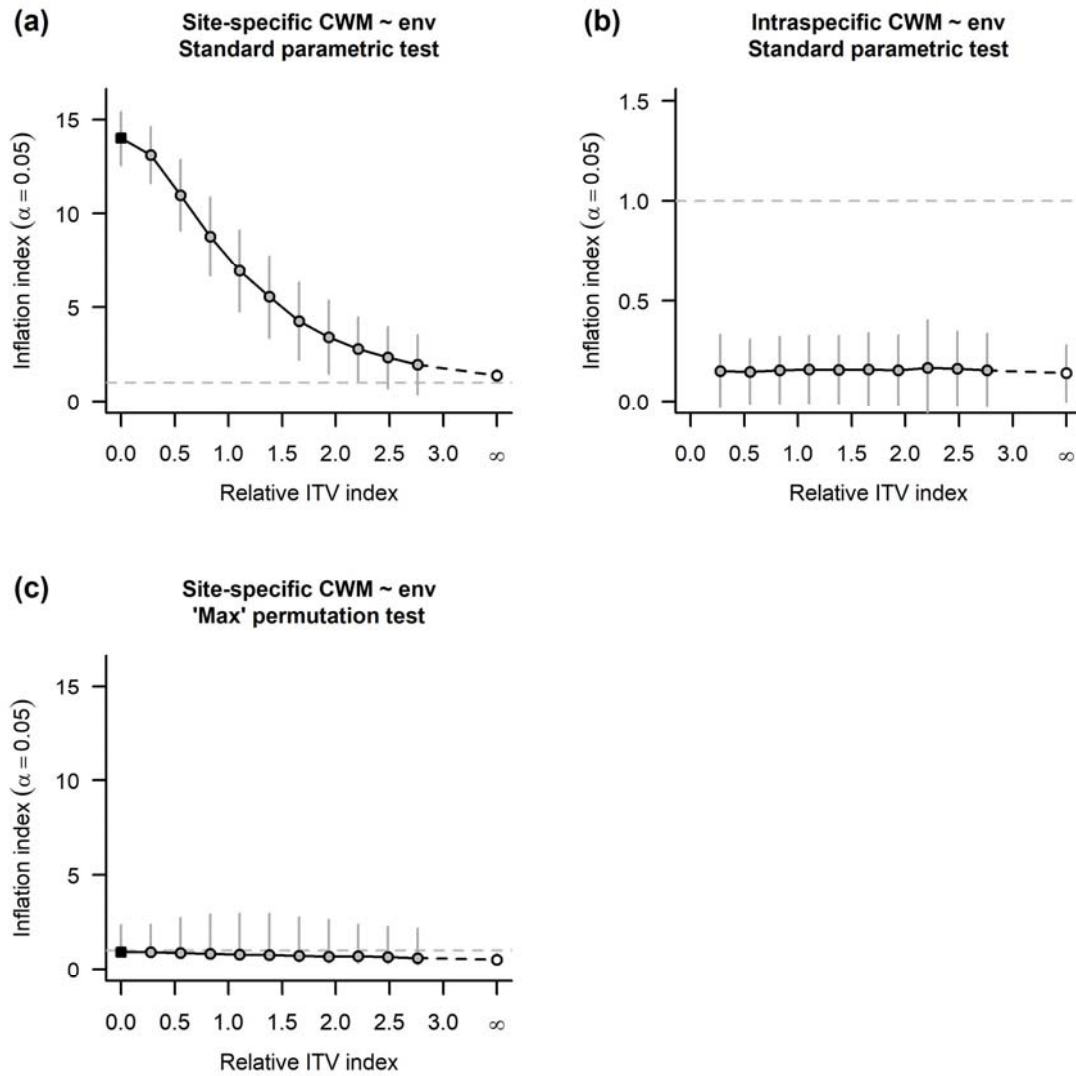

731

732

733 Figure 4

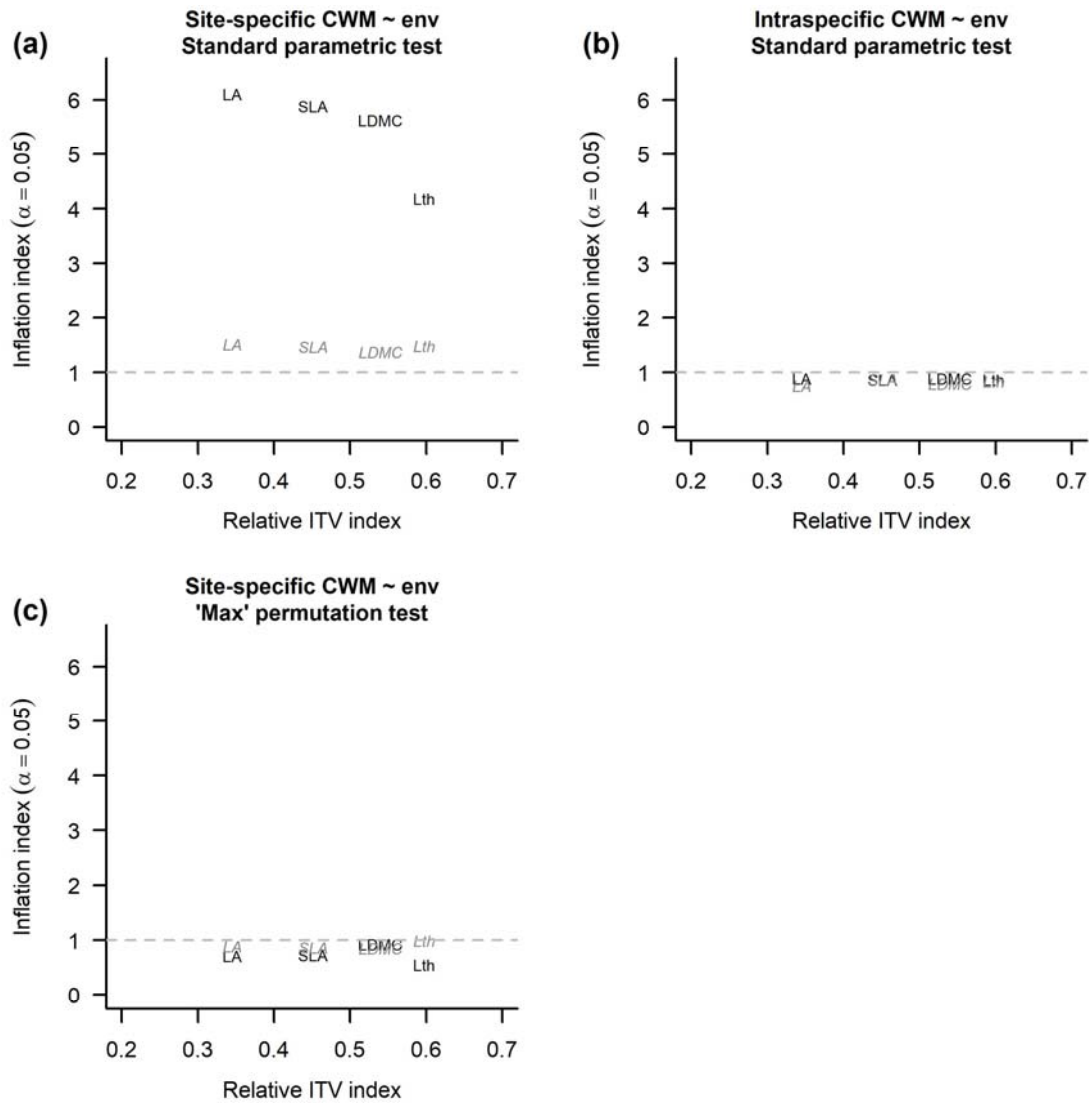

734

735

736 Figure 5

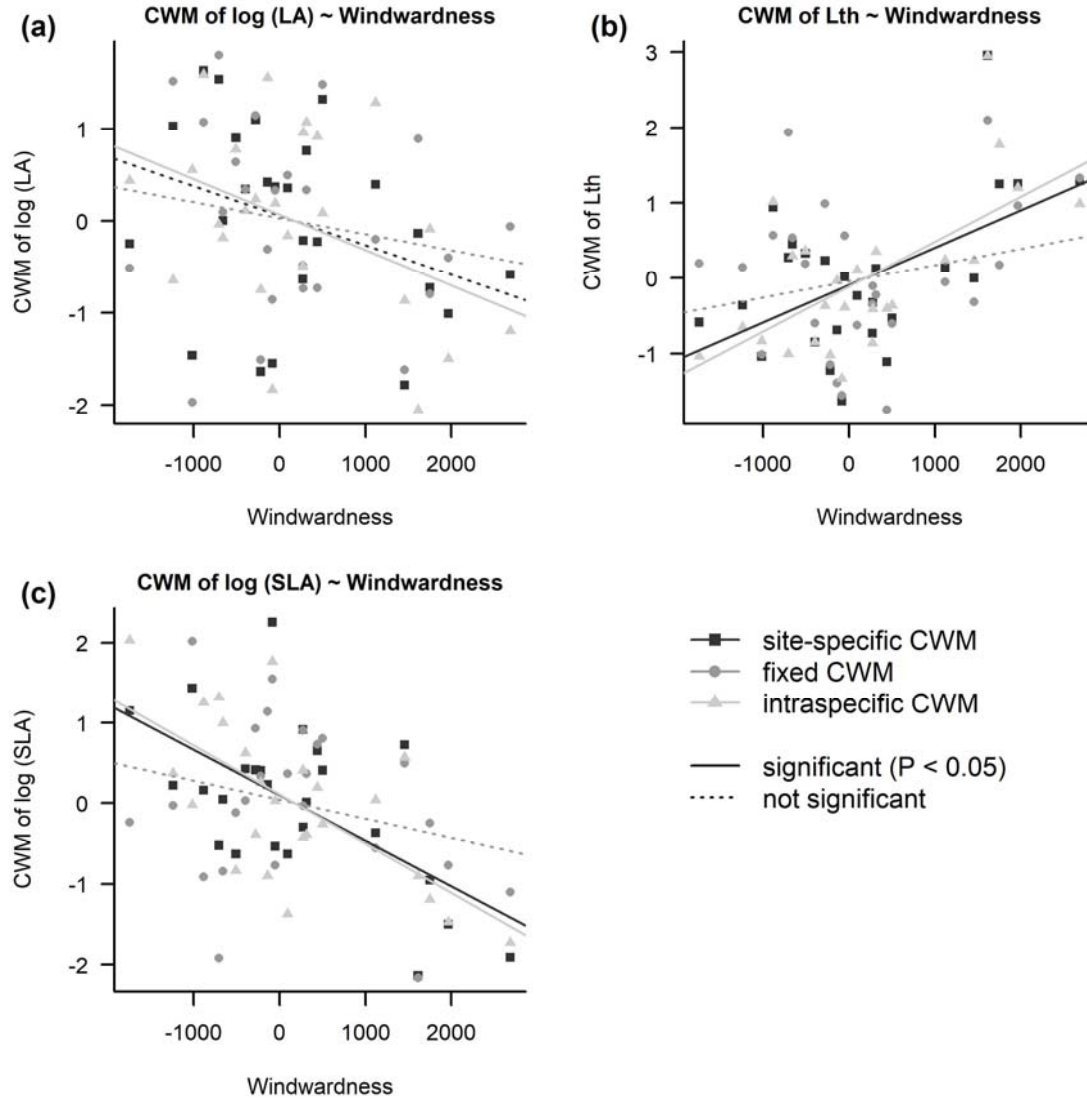

737
